# Supplementary material
Source: PubMed Central journal article supplement (PMC3418792)
Supplement: NIHMS355894-supplement-supplement_1.pdf [file NIHMS355894-supplement-supplement_1.pdf]

**ONLINE SUPPLEMENT FOR**

**SUBOPTIMAL INHIBITION OF PLATELET CYCLOOXYGENASE-1 BY ASPIRIN IN  
METABOLIC SYNDROME**

James P. Smith, MD,<sup>1\*</sup> Elias V. Haddad, MD,<sup>1\*</sup> Mary B. Taylor, MD, MSCI,<sup>2</sup> Denise Oram,  
BA,<sup>1</sup> Dana Blakemore, MS,<sup>3</sup> Qingxia Chen, PhD,<sup>3</sup> Olivier Bouataud, PhD,<sup>4</sup> John A. Oates, MD<sup>1,4</sup>

<sup>1</sup>Department of Medicine, <sup>2</sup>Department of Pediatrics, <sup>3</sup>Department of Biostatistics,  
<sup>4</sup>Department of Pharmacology, Vanderbilt University Medical Center.

\* Authors contributed equally.

## Supplemental Methods

We enrolled 181 patients with CAD in the observational study. Of these, 135 fulfilled the criteria for inclusion in the cohort for analysis. Eight of the enrolled patients were excluded because of laboratory abnormalities that returned after initiation of aspirin therapy. In five, phlebotomy was inadequate for platelet function studies. Ten patients admitted use of systemic anti-inflammatory medications and one patient admitted non-compliance. A change in aspirin dose or initiation of other anti-platelet agents by a non-study physician occurred in three patients. Inclusion/exclusion errors were discovered in two patients, and the presence of metabolic syndrome could not be determined for 11 patients because of missing data (American Heart Association/National Heart, Lung and Blood Institute [AHA/NHLBI] criteria).<sup>1</sup> One underwent percutaneous coronary intervention, four were lost to follow-up, and one withdrew for personal reasons.

From the above 181 patients, 106 consecutive subjects were enrolled in a nested randomized controlled investigation of enteric-coated aspirin. Of the 54 patients randomized to enteric-coated aspirin, nine were withdrawn: three for unsuccessful phlebotomy, two for use of other antiplatelet agents mid-study, two for self-reported use of systemic anti-inflammatory medication, one for percutaneous coronary intervention with stent placement during the study, and one for an error in enrollment (CABG within 6 months). Of the 52 patients randomized to immediate-release aspirin, five were withdrawn: two for laboratory abnormalities discovered on the day of recruitment but after enrollment, one for self-reported NSAID use, one for loss to follow-up, and one for withdrawal for personal reasons. Therefore, the final analytic cohort of 135 patients in the observational study included 45 randomized to enteric-coated aspirin and 47 randomized to immediate-release aspirin.

## Supplemental Information

Maximal inhibition of platelet activation by aspirin requires almost complete inhibition of platelet cyclooxygenase. This conclusion is drawn from a number of investigations which, although employing different analytical methods and endpoints, all conclude that inhibition of thromboxane A<sub>2</sub> biosynthesis by platelets to less than 5% of untreated levels or to equivalent levels of sTxB<sub>2</sub> is required to achieve the maximal effect of aspirin on platelet function or cardiovascular events. Data from our laboratory indicated that more than 95% inhibition of thrombin stimulated TxB<sub>2</sub> formation (radioimmunoassay) is required for maximal inhibition of platelet aggregation and serotonin release.<sup>2</sup> The studies with the TxA<sub>2</sub> antagonist presented herein also demonstrate that inhibition of TxA<sub>2</sub> dependent platelet aggregation is incomplete when sTxB<sub>2</sub> levels exceed 13 ng/ml. Biosynthesis of thromboxane A<sub>2</sub> in humans, measured as excretion of its metabolite, is sustained to a substantial degree until more than 95% inhibition of sTxB<sub>2</sub> (mass spectrometric analysis) is achieved.<sup>3</sup> Santilli *et al.* found that > 97% suppression of sTxB<sub>2</sub> (radioimmunoassay) was required for maximal inhibition of platelet function.<sup>4</sup> Frelinger *et al.* demonstrated that major adverse cardiovascular events were increased in patients with sTxB<sub>2</sub> (ELISA) greater than 3.1 ng/ml.<sup>5</sup> The levels of sTxB<sub>2</sub> measured in normal individuals by immunologic and mass spectrometric methods are similar, but data comparing the two analytical approaches at the low levels of sTxB<sub>2</sub> during aspirin treatment are lacking to our knowledge. All of this evidence, obtained with both methods of analysis, supports a conclusion that inhibition of

sTxB<sub>2</sub> by less than 95% represents suboptimal inhibition of TxA<sub>2</sub> dependent platelet activation. Because of the evidence that >95% inhibition may well be required for maximal inhibition of TxA<sub>2</sub> dependent platelet activation, log-transformed sTxB<sub>2</sub> was analyzed as a continuous variable in a linear regression model in which metabolic syndrome significantly associated with higher sTxB<sub>2</sub> (P=0.006).

## References

1. Grundy SM, Cleeman JI, Daniels SR, Donato KA, Eckel RH, Franklin BA, Gordon DJ, Krauss RM, Savage PJ, Smith SC, Jr., Spertus JA, Costa F. Diagnosis and management of the metabolic syndrome: An american heart association/national heart, lung, and blood institute scientific statement. *Circulation*. 2005;112:2735-2752.
2. FitzGerald GA, Oates JA, Hawiger J, Maas RL, Roberts LJ, 2nd, Lawson JA, Brash AR. Endogenous biosynthesis of prostacyclin and thromboxane and platelet function during chronic administration of aspirin in man. *J Clin Invest*. 1983;71:676-688.
3. Reilly IA, FitzGerald GA. Inhibition of thromboxane formation in vivo and ex vivo: Implications for therapy with platelet inhibitory drugs. *Blood*. 1987;69:180-186.
4. Santilli F, Rocca B, De Cristofaro R, Lattanzio S, Pietrangelo L, Habib A, Pettinella C, Recchiuti A, Ferrante E, Ciabattini G, Davi G, Patrono C. Platelet cyclooxygenase inhibition by low-dose aspirin is not reflected consistently by platelet function assays: Implications for aspirin "resistance". *J Am Coll Cardiol*. 2009;53:667-677.
5. Frelinger AL, 3rd, Li Y, Linden MD, Barnard MR, Fox ML, Christie DJ, Furman MI, Michelson AD. Association of cyclooxygenase-1-dependent and -independent platelet function assays with adverse clinical outcomes in aspirin-treated patients presenting for cardiac catheterization. *Circulation*. 2009;120:2586-2596.

Table S1. Medication Use by Metabolic Syndrome Status

| Medications                  | MetSyn<br>(n=83) | No MetSyn<br>(n=52) | P      |
|------------------------------|------------------|---------------------|--------|
| Proton pump inhibitor        | 25 (30%)         | 12 (23%)            | 0.37   |
| H <sub>2</sub> antagonist    | 4 (5%)           | 4 (8%)              | 0.48   |
| Antacid                      | 29 (35%)         | 16 (31%)            | 0.62   |
| ACE inhibitors               | 41 (49%)         | 24 (46%)            | 0.71   |
| Angiotensin-receptor blocker | 20 (24%)         | 10 (19%)            | 0.51   |
| Beta-blockers                | 58 (70%)         | 34 (65%)            | 0.59   |
| Calcium-channel blocker      | 16 (19%)         | 11 (21%)            | 0.79   |
| Statin                       | 74 (89%)         | 46 (88%)            | 0.90   |
| Other lipid-lowering therapy | 20 (24%)         | 20 (38%)            | 0.075  |
| Diuretic                     | 38 (46%)         | 25 (48%)            | 0.80   |
| Warfarin                     | 8 (10%)          | 5 (10%)             | 0.99   |
| Antidiabetic medication      | 29 (35%)         | 3 (6%)              | <0.001 |
| Insulin                      | 8 (10%)          | 2 (4%)              | 0.21   |

Table S2. sTxB<sub>2</sub> by Medication Class

| <b>Medications</b>           | <b>sTxB<sub>2</sub> &gt; 13<br/>ng/mL<br/>(n=12)</b> | <b>sTxB<sub>2</sub> ≤ 13<br/>ng/mL<br/>(n=123)</b> | <b>P</b> |
|------------------------------|------------------------------------------------------|----------------------------------------------------|----------|
| Proton pump inhibitor        | 3 (25%)                                              | 34 (28%)                                           | 1.0      |
| H <sub>2</sub> antagonist    | 0                                                    | 8 (7%)                                             | 1.0      |
| Antacid                      | 3 (25%)                                              | 42 (34%)                                           | 0.75     |
| ACE inhibitors               | 3 (25%)                                              | 62 (50%)                                           | 0.13     |
| Angiotensin-receptor blocker | 2 (17%)                                              | 37 (30%)                                           | 0.51     |
| Beta-blockers                | 8 (67%)                                              | 84 (68%)                                           | 1.0      |
| Calcium-channel blocker      | 3 (25%)                                              | 24 (20%)                                           | 0.71     |
| Statin                       | 10 (83%)                                             | 110 (89%)                                          | 0.62     |
| Other lipid-lowering therapy | 3 (25%)                                              | 37 (30%)                                           | 1.0      |
| Diuretic                     | 5 (42%)                                              | 58 (47%)                                           | 0.77     |
| Warfarin                     | 1 (8%)                                               | 12 (10%)                                           | 1.0      |
| Antidiabetic medication      | 3 (25%)                                              | 29 (24%)                                           | 1.0      |
| Insulin                      | 0                                                    | 10 (8%)                                            | 0.60     |

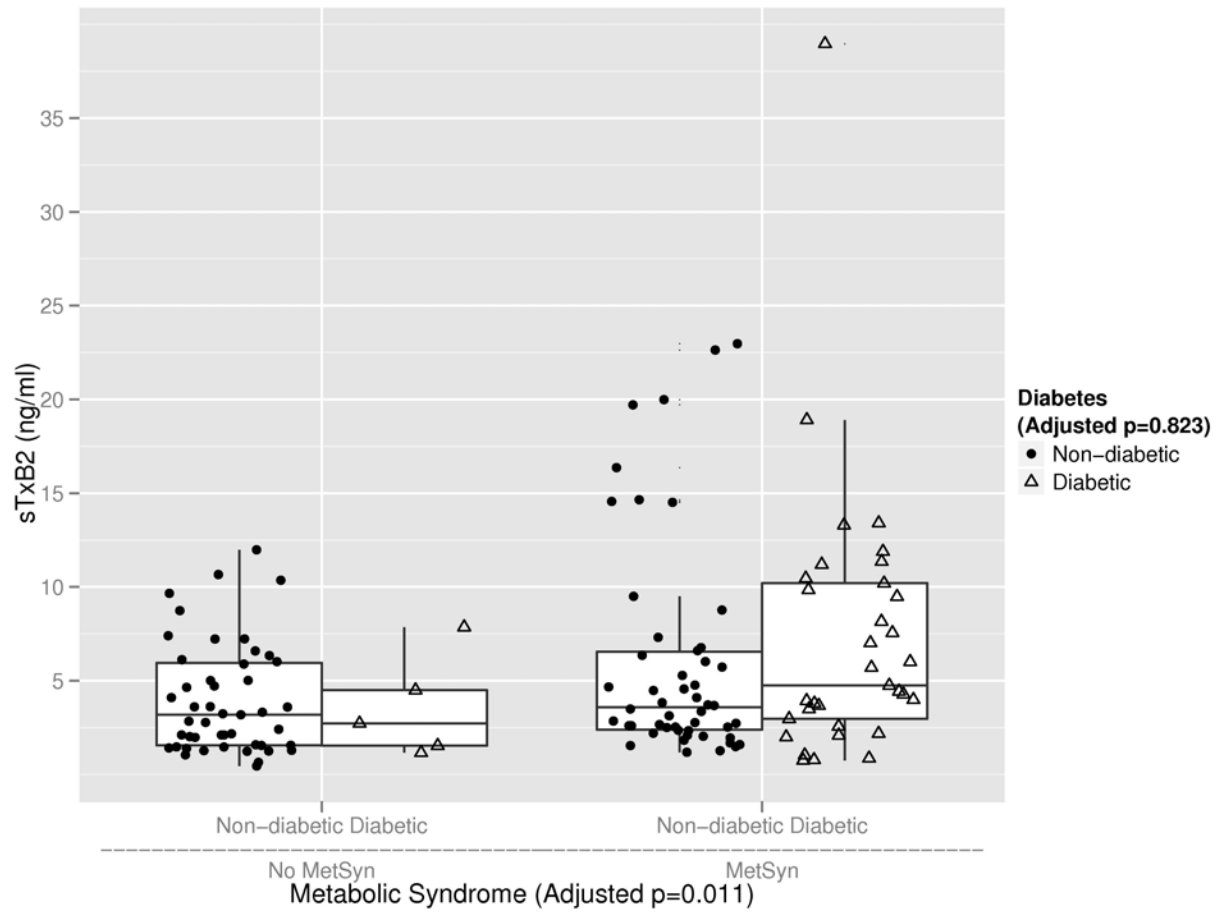

Figure S1. Serum TxB<sub>2</sub> levels stratified by presence of diabetes and metabolic syndrome. Metabolic syndrome, but not diabetes, significantly associated with higher levels of sTxB<sub>2</sub> in a linear regression model that included adjustment for age, sex, smoking status, platelet count, and aspirin formulation.

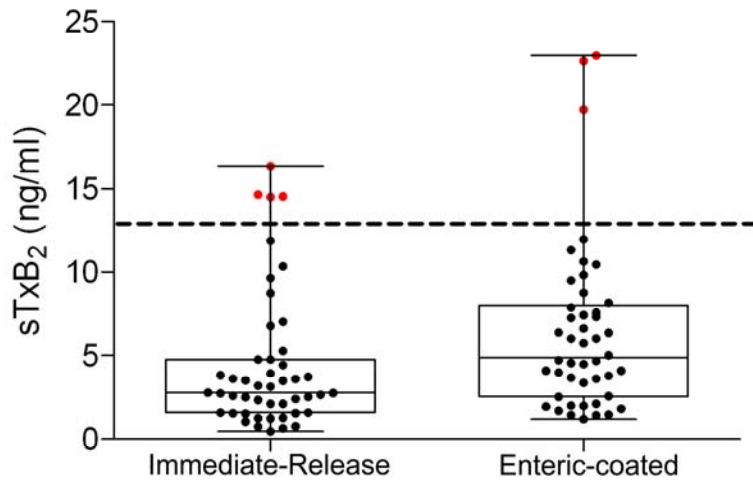

Figure S2. Serum TxB<sub>2</sub> levels were systematically higher and exhibited greater variability among patients randomized to enteric-coated aspirin compared with those randomized to immediate-release aspirin (P=0.005). The dashed line (13 ng/mL) represents an estimate of 95% inhibition of cyclooxygenase. The bounds of the boxes indicate the 1<sup>st</sup> and 3<sup>rd</sup> quartiles; the line within the box indicates the median.
